# Supplementary material for: Using the Developmental GeneBicoidto Identify Species of Forensically Important Blowflies (Diptera: Calliphoridae)
Source: Hindawi journal article supplement (doi:10.1155/2013/538051), 2013-01-01
Supplement: f2 [file 538051.f2.pdf]

*Drosophila melanogaster*

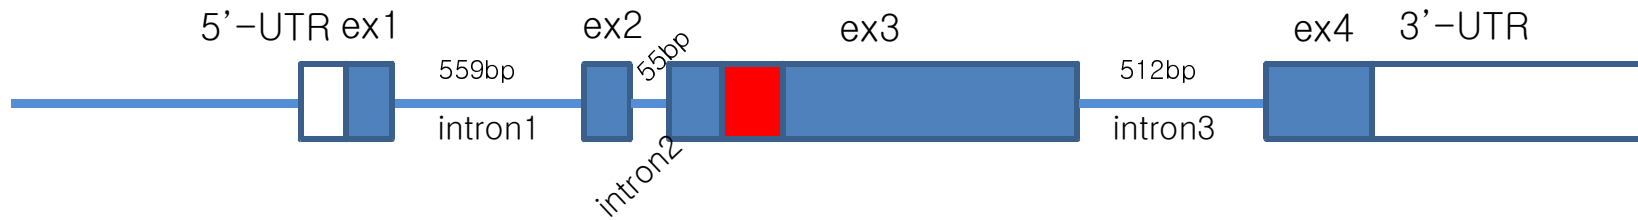

*Drosophila simulans*

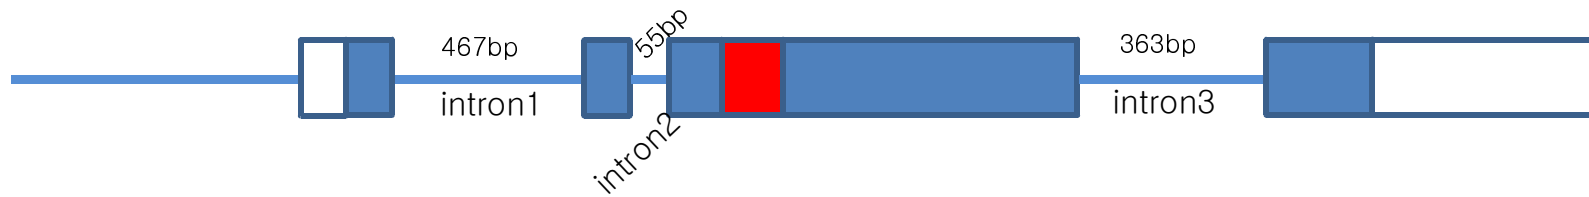

*Musca domestica*

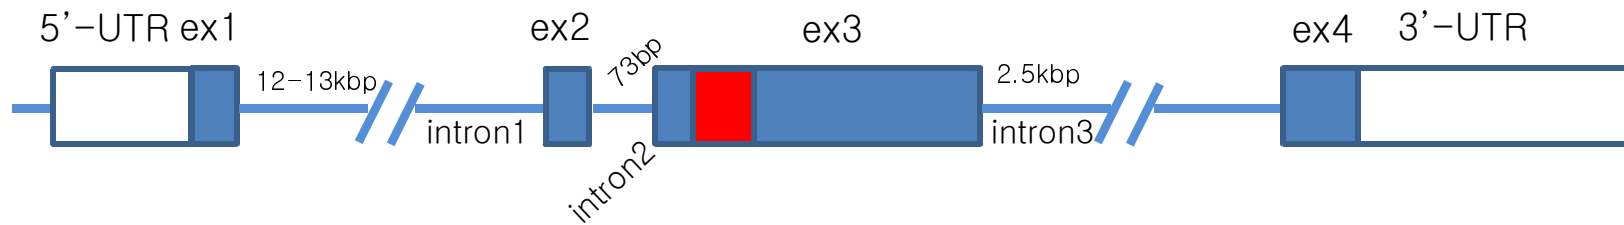

 : homeobox
