# Supplementary material for: Using the Developmental GeneBicoidto Identify Species of Forensically Important Blowflies (Diptera: Calliphoridae)
Source: Hindawi journal article supplement (doi:10.1155/2013/538051), 2013-01-01
Supplement: f3 [file 538051.f3.pdf]

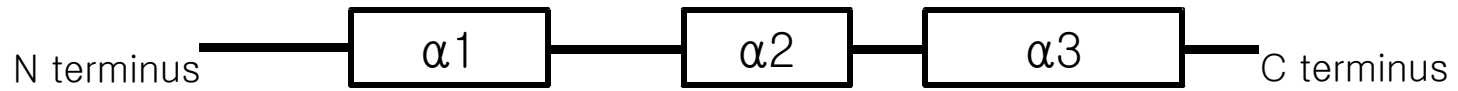

|                                     |            |            |            |            |            |            |
|-------------------------------------|------------|------------|------------|------------|------------|------------|
| <i>Megaselia abdita</i>             | RRRTRTTFTS | SQIAELEEYF | RQGKYLNNIR | LSELTGRLNL | GQAQVKIWFK | NRRRRFKIEQ |
| <i>Drosophila melanogaster</i>      | RRRTRTTFTS | SQIAELEQHF | LQGRYLTAPR | LADLSAKLAL | GTAQVKIWFK | NRRRRHKIQS |
| <i>Musca domestica</i>              | RRRTRTTFTS | AQIAELEQHF | LQGRYLTSSR | LAELSAKLTL | GTAQVKIWFK | NRRRRHKIQS |
| <i>Aldrichina grahami</i>           | .....      | .....      | .....      | .....A.    | .....      | .....      |
| <i>Lucilia illustris</i>            | .....      | .....      | .....      | .....A.    | .....      | .....      |
| <i>Lucilia caesar</i>               | .....      | .....      | .....      | .....A.    | .....      | .....      |
| <i>Lucilia ampullacea</i>           | .....      | .....      | .....      | .....V.A.  | .....      | .....      |
| <i>Lucilia sericata</i>             | .....      | .....      | .....      | .....A.    | .....      | .....      |
| <i>Triceratopyga calliphoroides</i> | .....      | .....      | .....      | .....G.    | .....      | .....      |
| <i>Chrysomya megacephala</i>        | .....      | .....      | .....      | .....A.    | .....      | .....      |
| <i>Chrysomya pinguis</i>            | .....      | .....      | .....      | .....A.    | .....      | .....      |
| <i>Calliphora vicina</i>            | .....      | .....      | .....      | .....A.    | .....      | .....A     |
| <i>Phormia regina</i>               | .....      | .....      | .....      | .....A.    | .....      | .....      |
| <i>Calliphora lata</i>              | .....      | .....      | .....      | .....A.    | .....      | .....      |
| <i>Hemipyrellia ligurriens</i>      | .....      | .....      | .....      | .....A.    | .....      | .....      |

Suppl Fig. 2
